# Combining Nitrous Oxide with Carbon Dioxide Decreases the Time to Loss of Consciousness during Euthanasia in Mice — Refinement of Animal Welfare?

Aurelie A. Thomas<sup>1\*</sup>, Paul A. Flecknell<sup>1</sup>, Huw D. R. Gollidge<sup>2</sup>

**1** Comparative Biology Centre, Medical School, Newcastle University, Newcastle Upon Tyne, United Kingdom, **2** Institute of Neuroscience, Medical School, Newcastle University, Newcastle Upon Tyne, United Kingdom

## Abstract

Carbon dioxide (CO<sub>2</sub>) is the most commonly used euthanasia agent for rodents despite potentially causing pain and distress. Nitrous oxide is used in man to speed induction of anaesthesia with volatile anaesthetics, via a mechanism referred to as the “second gas” effect. We therefore evaluated the addition of Nitrous Oxide (N<sub>2</sub>O) to a rising CO<sub>2</sub> concentration could be used as a welfare refinement of the euthanasia process in mice, by shortening the duration of conscious exposure to CO<sub>2</sub>. Firstly, to assess the effect of N<sub>2</sub>O on the induction of anaesthesia in mice, 12 female C57Bl/6 mice were anaesthetized in a crossover protocol with the following combinations: Isoflurane (5%)+O<sub>2</sub> (95%); Isoflurane (5%)+N<sub>2</sub>O (75%)+O<sub>2</sub> (25%) and N<sub>2</sub>O (75%)+O<sub>2</sub> (25%) with a total flow rate of 3l/min (into a 7l induction chamber). The addition of N<sub>2</sub>O to isoflurane reduced the time to loss of the righting reflex by 17.6%. Secondly, 18 C57Bl/6 and 18 CD1 mice were individually euthanized by gradually filling the induction chamber with either: CO<sub>2</sub> (20% of the chamber volume.min<sup>-1</sup>); CO<sub>2</sub>+N<sub>2</sub>O (20 and 60% of the chamber volume.min<sup>-1</sup> respectively); or CO<sub>2</sub>+Nitrogen (N<sub>2</sub>) (20 and 60% of the chamber volume.min<sup>-1</sup>). Arterial partial pressure (P<sub>a</sub>) of O<sub>2</sub> and CO<sub>2</sub> were measured as well as blood pH and lactate. When compared to the gradually rising CO<sub>2</sub> euthanasia, addition of a high concentration of N<sub>2</sub>O to CO<sub>2</sub> lowered the time to loss of righting reflex by 10.3% (P<0.001), lead to a lower P<sub>a</sub>O<sub>2</sub> (12.55±3.67 mmHg, P<0.001), a higher lactataemia (4.64±1.04 mmol.l<sup>-1</sup>, P=0.026), without any behaviour indicative of distress. Nitrous oxide reduces the time of conscious exposure to gradually rising CO<sub>2</sub> during euthanasia and hence may reduce the duration of any stress or distress to which mice are exposed during euthanasia.

**Citation:** Thomas AA, Flecknell PA, Gollidge HDR (2012) Combining Nitrous Oxide with Carbon Dioxide Decreases the Time to Loss of Consciousness during Euthanasia in Mice — Refinement of Animal Welfare? PLoS ONE 7(3): e32290. doi:10.1371/journal.pone.0032290

**Editor:** Georges Chapouthier, Université Pierre et Marie Curie, France

**Received:** January 5, 2012; **Accepted:** January 26, 2012; **Published:** March 15, 2012

**Copyright:** © 2012 Thomas et al. This is an open-access article distributed under the terms of the Creative Commons Attribution License, which permits unrestricted use, distribution, and reproduction in any medium, provided the original author and source are credited.

**Funding:** HDRG is supported by a United Kingdom National Centre for the Replacement, Refinement and Reduction of Animals in Research strategic award (grant G1000878, website: <http://www.nc3rs.org.uk/researchportfolio/showcatportfolio.asp?id=204>). The funders had no role in study design, data collection and analysis, decision to publish, or preparation of the manuscript.

**Competing Interests:** The authors have declared that no competing interests exist.

\* E-mail: aurelie.thomas@ncl.ac.uk

## Introduction

Many millions of mice are used worldwide for scientific purposes, for example; approximately 3 million mice are currently used per year in the United Kingdom for scientific research [1]. Virtually all of these mice are euthanized at the end of the study. Since carbon dioxide (CO<sub>2</sub>) is the most common method of euthanasia in laboratory rodents [2–5], the majority of these mice will be killed using this agent. Carbon dioxide is an anaesthetic agent; its minimum alveolar concentration (MAC) is 403 mmHg (approximately 50% atm) in rats [6]. Carbon dioxide has been shown to dose-dependently acidify cerebrospinal fluid pH, consequently inhibiting central N-Methyl-D-Aspartate (NMDA) receptors [7], which may partially explain its mechanism of anaesthetic action.

For ethical and legal reasons (e.g. European directive 2010/63EU, and the Animals (Scientific Procedures) Act(1986) in the United Kingdom) it is essential to ensure that the process of euthanasia is carried out with as little pain and distress as possible. Despite the popularity of CO<sub>2</sub> for euthanasia, it has been shown that exposure to CO<sub>2</sub> is aversive to rodents [8–10]. Exposure to high concentrations of CO<sub>2</sub> may lead to pain in rodents, since

concentrations above 37% cause activation of nociceptive pathways in rats [11–12] and exposure of humans to similar concentrations is reported as painful [3]. Because loss of consciousness is expected to occur when the inspired concentration of CO<sub>2</sub> is approximately 30%, the UK recommendations for good practice of CO<sub>2</sub> euthanasia suggest the use of a gradually rising concentration of CO<sub>2</sub>. The use of 100% CO<sub>2</sub> at a flow rate of 20% of the Chamber Volume per Minute (CV.min<sup>-1</sup>) has been shown to produce loss of consciousness without evidence of pain, but not without the potential of rats experiencing stress or distress induced by mechanisms other than nociception [13]. Rodents show behavioural aversion to CO<sub>2</sub> at levels substantially below those expected to activate nociceptive pathways [11–12]. There are several potential mechanisms, which may underlie this aversion. Exposure to low concentrations of CO<sub>2</sub> (approximately 7%) causes dyspnoea in humans, which becomes severe at around 15% [14]. The possibility that conscious rodents may be experiencing dyspnoea when exposed to CO<sub>2</sub> is a potential welfare problem, as it is known that dyspnoea can be highly distressing in humans [15–17] and shares many features with pain [18–19]. It is possible that rodents may experience similar levels of dyspnoea at the same concentra-

tions, although this is difficult to detect, as, like pain, dyspnoea is a subjective experience. In addition, inhaled CO<sub>2</sub> has been shown to evoke fear behavior via activation of limbic structures including the amygdala in mice [20].

Given the evidence of rodent aversion to CO<sub>2</sub> and the range of potential mechanisms which may induce fear and distress it would be desirable to shorten the duration of exposure to CO<sub>2</sub> during euthanasia procedures if this could be achieved without either increasing the concentration of CO<sub>2</sub> to which animals are exposed or increasing the level of stress and/or distress which animals experience. One potential method for shortening CO<sub>2</sub> exposure duration is the addition of Nitrous Oxide to the euthanasia gas mixture. Nitrous Oxide (N<sub>2</sub>O) is a low solubility anaesthetic agent with mild analgesic properties [21–22]. The MAC of N<sub>2</sub>O lies within the range 150% and 235% in rats [23–25]. Inhaling high concentrations of N<sub>2</sub>O in combination with a volatile anaesthetic agent lowers the time to induction of anaesthesia in many species [26–29] via a mechanism commonly referred to as the “second gas effect” [30]. Kitahata and colleagues (1971) demonstrated that this second gas effect also occurred when N<sub>2</sub>O was combined with CO<sub>2</sub> in cats. To our knowledge this effect has never been demonstrated in rodents [31].

This study assessed whether the addition of a high inspired concentration of N<sub>2</sub>O to a standard gradually rising concentration of CO<sub>2</sub> (as is typically used for rodent euthanasia) would lower the time to loss of consciousness. A pilot study also examined whether combination of N<sub>2</sub>O with Isoflurane reduced the time to loss of consciousness in mice. In both cases, the existence of a second-gas effect would shorten the conscious experience of any potential distress experienced by mice during the euthanasia process and represent a potential animal welfare refinement if used in routine practice.

## Results

### Pilot study

The mice lost their righting reflex after 91.0±11.0 s when isoflurane was carried in 100% oxygen. The righting reflex was

lost significantly faster when isoflurane was carried in 25% O<sub>2</sub> and 75% N<sub>2</sub>O (69.7±7.0 s, P<0.0001, t-test). None of the mice receiving N<sub>2</sub>O alone (treatment 3) lost their righting reflex. Some ataxia was noted in this group as well as intermittent periods of immobility, but there were no obvious signs indicating distress or aversion.

### Main study

**Time to loss of righting reflex.** The anaesthetic agent significantly affected the time to loss of the righting reflex (see Figure 1, P<0.001, 3-way ANOVA) Mice anaesthetized with the mixture of CO<sub>2</sub> and N<sub>2</sub>O reached LORR significantly faster (96.7±7.9 s) than those anaesthetized with CO<sub>2</sub> alone (108.7±9.4 s, P=0.003) or CO<sub>2</sub> in N<sub>2</sub> (112.4±6.9 s, P<0.001). There was also a significant main effect of strain upon time to loss of consciousness, for all treatment conditions C57BL/6 mice lost consciousness faster than CD1 mice (P=0.009). There was no significant effect of the sex of the mice and no significant interactions between factors. For CO<sub>2</sub> group, the mean time to LORR corresponds to a F<sub>i</sub>CO<sub>2</sub> of 24% at LORR; against 20% for the CO<sub>2</sub>/N<sub>2</sub>O and 27% for the CO<sub>2</sub>/N<sub>2</sub> group.

**Blood gas analysis.** Arterial blood from the left cardiac ventricle was successfully obtained from 28 mice (9 mice from group 1, 11 mice from group 2, 9 mice from group 3). For all samples, the P<sub>a</sub>CO<sub>2</sub> was higher than the reportable range (>130 mmHg) of our blood gas analyzer. In one of the 11 blood samples obtained from the group 2 animals, no pH value was obtained. Average values for arterial blood pH, P<sub>a</sub>O<sub>2</sub> and lactate are presented in table 1.

The pH was below 7.0 in all mice. The mice receiving CO<sub>2</sub> alone for euthanasia were significantly more acidemic (P<0.001, 3-way ANOVA) compared to the 2 other groups (P<0.001 for both cases). The pH was not significantly different between mice receiving Nitrogen or Nitrous Oxide, nor did pH differ significantly between strains or sexes.

PaO<sub>2</sub> varied significantly between treatment groups (P<0.001). PaO<sub>2</sub> was significantly lower when N<sub>2</sub>O or N<sub>2</sub> were added to CO<sub>2</sub>

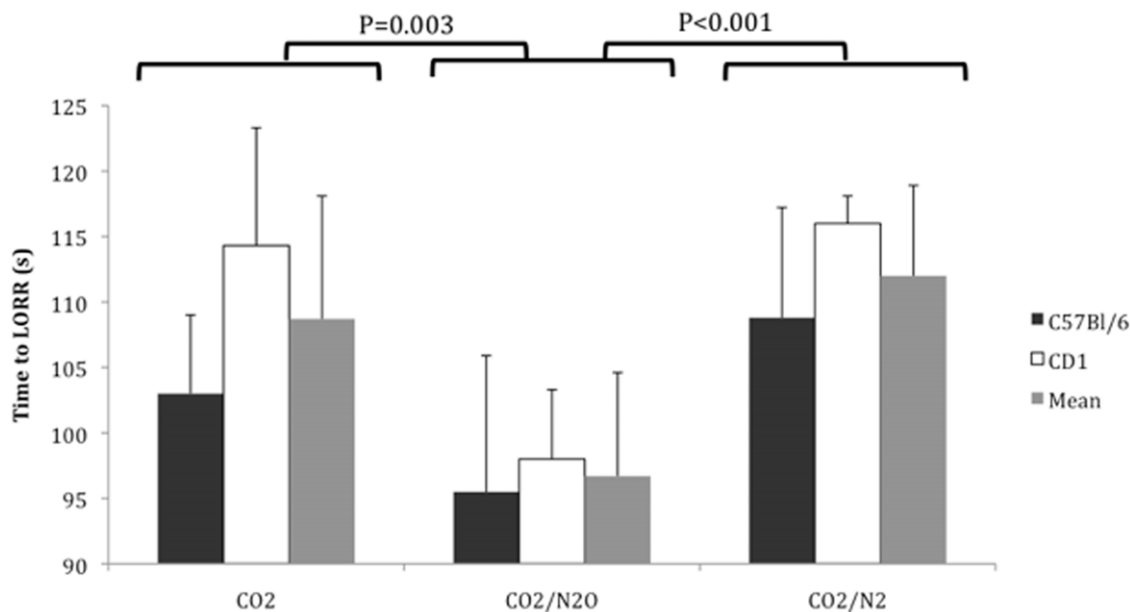

**Figure 1. Time to loss of righting reflex (LORR) in seconds within the 3 treatment groups and the 2 strains of mice (C57Bl/6 and CD1).** Error bars: +1 SD. Composition of the gas mixtures for the groups 1–3: see table 3. doi:10.1371/journal.pone.0032290.g001

**Table 1.** Values of pH, P<sub>a</sub>O<sub>2</sub> (mmHg) and lactate (mmol.l<sup>-1</sup>) measured in arterial blood at the time of loss of righting reflex.

| Group                                 | pH               | PaO <sub>2</sub>  | Lactate          |
|---------------------------------------|------------------|-------------------|------------------|
| 1 - CO <sub>2</sub>                   | 6.62±0.17 (n=9)  | 30.0±9.90 (n=9)   | 3.16±0.65 (n=9)  |
| 2 - CO <sub>2</sub> /N <sub>2</sub> O | 6.94±0.04 (n=10) | 12.55±3.67 (n=11) | 4.64±1.04 (n=11) |
| 3 - CO <sub>2</sub> /N <sub>2</sub>   | 6.89±0.04 (n=9)  | 13.11±5.32 (n=9)  | 5.92±1.67 (n=9)  |

Composition of the gas mixtures for the groups 1–3: see table 3.  
doi:10.1371/journal.pone.0032290.t001

( $P < 0.001$  for both comparisons). There were no significant main effects of strain or sex, but there was a significant interaction between strain and sex ( $P = 0.017$ ). PaO<sub>2</sub> did not differ significantly between the CO<sub>2</sub>+N<sub>2</sub> and CO<sub>2</sub>+N<sub>2</sub>O groups.

Blood lactate varied significantly between treatment groups ( $P < 0.001$ , three-way ANOVA). Lactate was significantly higher in the CO<sub>2</sub>+N<sub>2</sub> and CO<sub>2</sub>+N<sub>2</sub>O groups than in the CO<sub>2</sub> alone group ( $P = 0.026$  and  $P < 0.001$  respectively). Lactate level did not differ significantly between the CO<sub>2</sub>+N<sub>2</sub> and CO<sub>2</sub>+N<sub>2</sub>O groups.

**Behaviour analysis.** There was no significant difference between treatment groups with regards to the behaviours analyzed during the acclimatization period.

None of the mice jumped during their acclimatization period. The mice jumped when exposed to CO<sub>2</sub> ( $0.8 \pm 1.4$  jump.min<sup>-1</sup>) and significantly more often in the CO<sub>2</sub>/N<sub>2</sub> group ( $2.6 \pm 3.9$  jump.min<sup>-1</sup>,  $P = 0.039$ , 3-way ANOVA). None of the mice, in either strain, jumped when CO<sub>2</sub> was combined to N<sub>2</sub>O.

The incidence of rearing was  $4.6 \pm 3.4$ ,  $5.7 \pm 3.7$  and  $5.0 \pm 2.9$  rears per minute during the acclimatization period preceding euthanasia with CO<sub>2</sub>, CO<sub>2</sub>/N<sub>2</sub>O and CO<sub>2</sub>/N<sub>2</sub> respectively ( $P > 0.05$ , 3-way ANOVA). Once the gases were delivered to the chamber, the rate of rearing decreased. The mice receiving CO<sub>2</sub> with N<sub>2</sub>O reared significantly less once the gas flow started ( $1.29 \pm 1.36$ ,  $P < 0.001$ ).

A strain effect was detectable for rearing and jumping: the C57Bl/6 mice reared and jumped more frequently than the CD1 mice ( $P < 0.001$  and  $P = 0.003$  respectively). There was no significant effect of sex on the incidence of rearing.

## Discussion

Nitrous oxide has been used since the 19<sup>th</sup> century as an analgesic. It has also been used to induce anaesthesia although its use as a sole anaesthetic in humans has declined because concentrations sufficient to induce even moderate levels of anaesthesia render patients hypoxic [32]. Currently, N<sub>2</sub>O is used mixed with O<sub>2</sub> and general anaesthetic agents in human anaesthesia to lower the time to loss of consciousness [26,33] and for its analgesic properties, traditionally for labour and dental pain relief [34–35]. In dogs, the inhalation of high concentrations of N<sub>2</sub>O concurrently with halothane was shown to cause accelerated uptake of the latter agent [30,36]. Although this phenomenon was expected to speed induction of anaesthesia, N<sub>2</sub>O failed to improve the rate or quality of induction in dogs receiving newer inhalant agents (isoflurane and sevoflurane) when delivered in a 2:1 N<sub>2</sub>O and O<sub>2</sub> mixture [37]. There appear to be no published data describing the use of N<sub>2</sub>O to lower the time to induction of anaesthesia in rodents. We have shown that addition of N<sub>2</sub>O to both carbon dioxide and isoflurane reduces the time to loss of consciousness in mice. Nitrous oxide lowered the time to induction

by 17% when inhaled concurrently with isoflurane (pilot study) and by 10% when combined with CO<sub>2</sub> (main study).

The difference in magnitude of effect between the two agents could be explained by a number of mechanisms including a difference in the quantity of N<sub>2</sub>O inhaled by animals in the two studies, the difference in anaesthetic potency between CO<sub>2</sub> and isoflurane, the strain effect noted in the main study or the difference of amplitude of cardiovascular side-effects caused by CO<sub>2</sub> and isoflurane.

In our pilot study, N<sub>2</sub>O was delivered with a flow rate of 3 l.min<sup>-1</sup> in each of the 3 groups. Our induction chamber had a volume of 7 litres, hence this represents a flow rate of 43% of the chamber volume per minute, in the main study 60% of the chamber volume of N<sub>2</sub>O was delivered. The mechanism explaining the “second gas effect” [30] relies on the rapid intake of a large volume of the very insoluble N<sub>2</sub>O from the lungs. Hence it is likely that the difference in volume of N<sub>2</sub>O delivered per minute had an impact on the speed of induction of anaesthesia. However, less N<sub>2</sub>O was delivered in combination with Isoflurane, yet the time to induction was shorter. If the difference in inspired fraction (F<sub>i</sub>) of N<sub>2</sub>O was the main factor responsible for the difference of amplitude, we would then have expected the mice from our pilot study to have a delayed induction compared to the mice from the main study. It is therefore unlikely that the difference of F<sub>i</sub> of N<sub>2</sub>O could explain the difference in time to LORR between our pilot and our main study.

Bispectral Index (BIS) is a neurophysiological monitoring technique which has been shown to correlate reliably with depth of anaesthesia in humans, Peyton and collaborators (2008) showed that the BIS was significantly lower (i.e. the anaesthesia was deeper) when the patients were induced with sevoflurane in 30% O<sub>2</sub> and 70% N<sub>2</sub>O than with sevoflurane in 100% O<sub>2</sub> [38]. Given that N<sub>2</sub>O itself does not alter the bispectral index [39] Peyton *et al's* results suggest that the second gas effect is more likely to be due to a higher early arterial partial pressure of anaesthetic agent rather than a sub-anaesthetic action of the N<sub>2</sub>O *per se*. In this regard, it is very likely that the difference in potency between CO<sub>2</sub> (MAC = 50% in rats; [6]) and isoflurane (MAC = 1.41% in mice; [40–41]) explains at least partially the difference of magnitude of effect in the two studies. Beyond the absolute potency of isoflurane and CO<sub>2</sub> as anaesthetic agents, the relative dose administered to our mice was different in the pilot and the main study. After 1 min of gas supply, the mice in the pilot study were receiving the equivalent of 1.52xMAC Isoflurane (F<sub>i</sub> = 5% × 43% CV.min<sup>-1</sup>, MAC = 1.41%) whereas the mice in the main study received only 0.4xMAC CO<sub>2</sub> (F<sub>i</sub> = 20% CV.min<sup>-1</sup>, MAC = 50%). This difference of dose received by the mice during their first minute of gas exposure could be part of the explanation for the smaller (but still statistically significant) amplitude of the N<sub>2</sub>O effect in our main study. A significant strain difference was consistently present (time to LORR, blood gas changes as well as behavioural analysis). In the case of time to LORR the C57Bl/6 mice lost consciousness faster than the CD1 mice. It is possible that we introduced some bias by using 2 different strains for our main study but only one, C57Bl/6 for our pilot study. Mouse strain might modestly influence MAC for isoflurane. Sonner and collaborators (1999) however showed that C57Bl/6 and CD1 mice have very similar MAC for isoflurane (1.30 and 1.34% respectively) [41]. No data are currently available regarding the strain effect on CO<sub>2</sub> MAC in mice. However it seems unlikely that the strain difference explains the difference of magnitude of effect between our pilot and main study.

Because the uptake of N<sub>2</sub>O is perfusion limited [42], its uptake will be optimal in lung compartments with a lower ventilation/

perfusion (V/Q) ratio [30]. These compartments receive most of the blood flow and predominantly determine the composition of gases in arterial blood. The V/Q mismatch is a dynamic ratio during anaesthesia, depending on muscle relaxation, but also on the respiratory and cardio-vascular side-effects of the anaesthetic agent used. Isoflurane and N<sub>2</sub>O produce only moderate respiratory and cardiovascular depression in rodents [40] and are unlikely to significantly disrupt the V/Q ratio of lung compartments. Carbon dioxide on the other hand is known to have dramatic cardiovascular side-effects and to disrupt the V/Q ratio. At high concentration CO<sub>2</sub> stimulates the nasal mucosa in rats and produces apnoea, as well as a strong and immediate vagally mediated bradycardia and a sympathetically mediated systemic and pulmonary hypertension [43–45]. These strong side-effects preclude the use of CO<sub>2</sub> as an anaesthetic for anything other than very brief procedures [46–47]. It is likely that the severe bradycardia combined with the changes in pulmonary perfusion produced by CO<sub>2</sub> would disrupt the V/Q ratio enough to alter N<sub>2</sub>O uptake and decrease the second gas effect, probably explaining why the mice lost consciousness only 10% faster when N<sub>2</sub>O was added to CO<sub>2</sub> – compared to 17% faster when N<sub>2</sub>O was added to isoflurane.

The addition of nitrous oxide to carbon dioxide had a significant effect in reducing the time between first exposure to the gas and loss of consciousness. The presence of a high concentration of N<sub>2</sub>O in the gas mixture also accompanied a reduction in F<sub>i</sub>CO<sub>2</sub> at the time of loss of righting reflex (F<sub>i</sub>CO<sub>2</sub> = 24% in the CO<sub>2</sub> group, compared to 20% in the CO<sub>2</sub>+N<sub>2</sub>O group). Given that the noxious threshold for CO<sub>2</sub> was above 37% in rats [11–12], our study would support the view that the use of a gradually rising concentration of CO<sub>2</sub> in the induction chamber allows the mice to lose consciousness before experiencing pain [13]. If higher CO<sub>2</sub> flow rates are used, where noxious concentrations of CO<sub>2</sub> would be reached before loss of consciousness, the addition of N<sub>2</sub>O could avoid the perception of CO<sub>2</sub>-induced pain. The benefit of the addition of high concentrations of N<sub>2</sub>O to CO<sub>2</sub> at 20% chamber volume per minute CO<sub>2</sub> flow rates however would primarily be in shortening the conscious exposure to the gas and therefore minimizing the duration of any period of distress. Since concentrations of CO<sub>2</sub> below those likely to cause pain have been shown to produce aversion in both rats [9] and mice [10], it is reasonable to suggest that N<sub>2</sub>O may reduce any period of such distress during the procedure. Whether a 10% reduction in this period represents a significant welfare benefit depends upon the degree and the type of distress experienced by mice during the euthanasia process.

The addition of N<sub>2</sub>O to the gas mixture had the expected physiological effects on the blood gas analyses. The mice were more severely hypoxic in the CO<sub>2</sub>/N<sub>2</sub>O and CO<sub>2</sub>/N<sub>2</sub> groups than in the group 1, which underwent standard gradual-fill CO<sub>2</sub> euthanasia. This was expected as the O<sub>2</sub> initially present in the induction chamber would be more quickly displaced by the presence of a second gas in the euthanasia mixture. Despite the commonly held notion that hypoxia does not produce dyspnoea hyperoxia was shown to generate an equivalent level of air hunger as hypercapnia in humans [48–49]. The ventilatory response to hypoxia furthermore depends on the level of CO<sub>2</sub> [50] and it has been shown that in conscious humans the effect of progressive hypoxia on breathing is much greater if there is a concomitant increase in inspired CO<sub>2</sub> [51–52]. In our study, N<sub>2</sub>O reduced the time spent conscious in the induction chamber. However, N<sub>2</sub>O also rendered the mice more severely hypoxic, and we cannot exclude the possibility that this may induce more severe air-hunger than induction with CO<sub>2</sub> alone.

Studies carried out in people show that dyspnoea/air hunger is more than just a physical sensation and has an important affective component [53–54]. This affective component to the dyspnoeic sensation leads to distress in people [16]. Interestingly, recent studies indicate that the perception of dyspnoea and pain involves similar CNS structures [17,19]. We attempted in our study to assess the potential distress experienced by the mice by scoring behaviours potentially associated with distress.

Amongst the four behavioural events analyzed, the incidence of jumping is the most interesting. Jumping involved an intense springing upwards of the mouse with a sudden extension of the hindlimbs. The amplitude of the jump was such that the mice frequently collided with the roof of the induction chamber (14 cm height). Jumps frequently occurred in rapid succession (3–6 jumps), in-between each bout of jumping the animals appeared normally conscious and ambulatory. None of the animals exhibited any jumping behaviour during the acclimatisation period, reinforcing the authors' belief that these jumps are not part of the normal behavioural repertoire of this species. Irwin (1968) described “popcorn” jumping behaviours in mice in his behavioural and physiologic state assessment of the mouse [55]. Irwin describes this as “a seizure where the animal repeatedly “pops” into the air”. Although this description would fit our observation of the jumps, we consider it most unlikely that the animals were undergoing seizures since they appeared fully conscious immediately before and after jumps.

In this study, the mice exhibited jumping behaviour when exposed to CO<sub>2</sub> at the recommended flow rate of 20% CV.min<sup>-1</sup> and significantly more often when a high concentration of N<sub>2</sub> was added to CO<sub>2</sub>. We interpret jumping as escape behaviour, possibly related to hypoxia. None of the mice exhibited jumping when N<sub>2</sub>O was added to CO<sub>2</sub>. This could be explained by a more rapid onset of sedation resulting from the combination of the two anaesthetic agents. Whereas unconsciousness is due to anaesthetic action into the brain, recent evidence suggests that immobilization under general anaesthesia is achieved by anaesthetic effect on the spinal cord [56–57]. Amongst the potential spinal receptors numerous results suggest the potential importance of NMDA receptors as mediators of the immobilizing capacity of inhaled anaesthetics [41,58]. Both CO<sub>2</sub> and N<sub>2</sub>O are known to act on central NMDA receptors, hence the combination of CO<sub>2</sub> and N<sub>2</sub>O may enhance some spinal NMDA antagonism, leading to decreased mobility of the animal.

The mice from all three groups were acidaemic [59] and hypoxemic [60] at the time of loss of righting reflex. The hypoxemia is likely to be explained by the low inspired O<sub>2</sub> within all treatments. This was significantly more marked in groups 2 and 3, where N<sub>2</sub> or N<sub>2</sub>O were administered along with CO<sub>2</sub>. The hypoxemia would have triggered an increase in anaerobic metabolism, producing lactic acid. Although in all groups the acidaemia is likely to be mainly of respiratory origin, the lactic component might be significant for the mice euthanized with CO<sub>2</sub> and N<sub>2</sub>O or CO<sub>2</sub> and N<sub>2</sub> [61].

Whilst the level of CO<sub>2</sub> to which mice are exposed during euthanasia is unlikely to cause pain by the direct action of CO<sub>2</sub> upon mucosal surfaces [12] we cannot exclude the possibility that systemic lactic acidosis and consequent activation of ASIC channels could cause pain [62–67]. Were this to be the case then the increased lactate levels we observed when N<sub>2</sub>O was added could represent a welfare issue. However, we observed no behavioural evidence of this effect but further investigation would be required to confirm that Nitrous Oxide induced lactic acidosis is not detrimental to the welfare of mice killed with an N<sub>2</sub>O/CO<sub>2</sub> mixture.

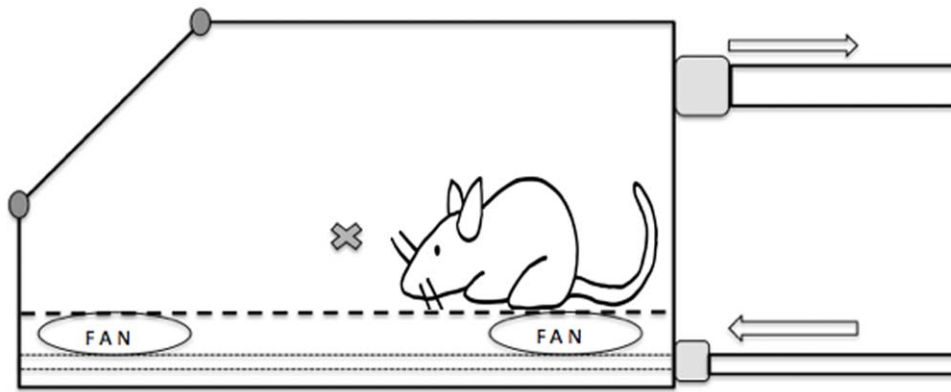

**Figure 2. Diagram representing the induction chamber.** The fresh gas inlet (bottom arrow) of the chosen mixture was delivered underneath a multi-perforated floor. A total of 4 mini fans were ensuring that the mixture was optimally blended. The sampling end of the sidestream gas monitoring (X) was positioned at mouse level, 8 cm above the floor. The gas outlet (upper arrow) was connected to an active scavenging system. doi:10.1371/journal.pone.0032290.g002

In conclusion, our main results suggest that the addition of a high concentration of N<sub>2</sub>O to a commonly recommended flow-rate of CO<sub>2</sub> for the euthanasia of mice shortens the time to loss of consciousness by 10% without triggering any obvious increase in behavioural signs of aversion or distress. Therefore, nitrous oxide reduces the duration of conscious exposure to CO<sub>2</sub> and potentially reduces the duration of distress. Determining whether N<sub>2</sub>O represents a worthwhile refinement to CO<sub>2</sub> euthanasia in rodents requires further studies in order to accurately assess distress in mice during gradually raising CO<sub>2</sub> exposure as well as the welfare impact on conscious rodents of severe hypoxemia and acidosis. Future studies should also examine what concentration of nitrous oxide is optimal for minimizing the duration of conscious exposure to CO<sub>2</sub>.

## Materials and Methods

### Ethical Statement

This study was carried out in accordance with project and personal licenses granted under the United Kingdom's Animals (Scientific Procedures) Act (1986) and Newcastle University Ethical Review Committee specifically approved this study at (PPL 60/4126 and 60/4058).

### Animals

A total of 18 CD1 mice (9 females, 9 males, aged 10–12 weeks, weight 26.9±0.5 g) and 30 C57Bl/6 mice (21 females, 9 males, aged 10–12 weeks, weight 25.6±0.7 g) were used in the study (Charles River, Kent, UK). All mice were housed in groups of 3 in individually ventilated cages (Arrowmigh, Hereford, UK). The animal room was maintained at 23±1°C, 35% humidity and on a 12/12 h light/dark cycle (lights on at 07:00) with 15–20 air changes per hour. Food (CRM (P), SDS Ltd, Essex UK) and tap water were provided *ad libitum*. Sawdust bedding (Aspen, BS and S Ltd, Edinburgh, UK) was provided along with nesting material (Shredded paper, DBM, Broxburn, UK). All mice were allowed a period of at least 14 days of acclimatization before the procedure. Mice were maintained in a facility that was shown by serological monitoring to be free from all recognized rodent respiratory pathogens.

### Equipment

A 7-litre clear Plexiglas induction chamber (VetTech Solutions LTD, Congleton, UK) was connected to an anaesthesia machine

(Selectatec SM, Cyprane Limited, Keighley, UK) equipped with CO<sub>2</sub>, N<sub>2</sub>O and N<sub>2</sub> cylinders (B.O.C., Chester-Le-Street, UK). The gas mixture was delivered to the chamber via a single fresh gas inlet tube located underneath a multi-perforated plastic floor. The supply pipe had several outlet ports to ensure gas was supplied to the full length of the chamber. In order to optimize the blending of the mixture, 4 miniature fans were installed alongside the fresh gas inlet, under the perforated floor. These fans ensured that there was a linear increase in the concentration of each gas during filling and that gas concentrations and ratios were the same throughout the cage despite the different densities of the various gases.

The scavenging port, located at the top of the chamber, was connected to an active scavenging system (Figure 2). The concentrations of the agents in the chamber (CO<sub>2</sub>, O<sub>2</sub>, N<sub>2</sub>O and Isoflurane) were monitored with a sidestream anaesthesia gas analyzer (VitaLogik 4500, Charter Kontron, Milton Keynes, UK). The end of the sampling tube of the gas analyzer was positioned 4 cm above the floor of the induction chamber in order to be at the approximate head level of a mouse walking in the chamber. The sampling rate of the gas analyzer was 50 ml/min. Once the F<sub>i</sub>CO<sub>2</sub> reached the upper limit detectable by the anaesthesia monitor (13% atm), an indirect and retrospective calculation using F<sub>i</sub>O<sub>2</sub> and F<sub>i</sub>N<sub>2</sub>O was used to calculate the CO<sub>2</sub> concentration. When CO<sub>2</sub> was delivered alone: [CO<sub>2</sub>] = 21-[O<sub>2</sub>]/0.21. When CO<sub>2</sub> was delivered with N<sub>2</sub>O: [CO<sub>2</sub>] = A similar calculation was used to calculate F<sub>i</sub>N<sub>2</sub>O. The induction chamber and the screen of the gas monitor were continually filmed by 2 high definition video cameras (HDR XR155E, Sony, Stuttgart, Germany) from the start of the procedure to the loss of consciousness of the mice.

**Table 2. Composition and flow rate of the anaesthetic mixtures used for anaesthesia induction – pilot study.**

| Treatment | Isoflurane (%) | O <sub>2</sub> (%) | N <sub>2</sub> O (%) | Flow (l.min <sup>-1</sup> ) |
|-----------|----------------|--------------------|----------------------|-----------------------------|
| 1         | 5              | 100                | 0                    | 3                           |
| 2         | 5              | 25                 | 75                   | 3                           |
| 3         | 0              | 25                 | 75                   | 3                           |

The Isoflurane % was read on the dial of the precision vaporizer, the O<sub>2</sub> and N<sub>2</sub>O % referred to the F<sub>i</sub> of the gases.

doi:10.1371/journal.pone.0032290.t002

**Table 3.** Composition and flow rates of the gas mixtures used for mice euthanasia- main study.

| Group        | n         | CO <sub>2</sub> (%CV.min <sup>-1</sup> ) | N <sub>2</sub> O (%CV.min <sup>-1</sup> ) | N <sub>2</sub> (%CV.min <sup>-1</sup> ) | Total (%CV.min <sup>-1</sup> ) |
|--------------|-----------|------------------------------------------|-------------------------------------------|-----------------------------------------|--------------------------------|
| 1            | 12        | 20                                       | /                                         | /                                       | 20                             |
| 2            | 12        | 20                                       | 60                                        | /                                       | 80                             |
| 3            | 12        | 20                                       | /                                         | 60                                      | 80                             |
| <b>Total</b> | <b>36</b> |                                          |                                           |                                         |                                |

CV.min<sup>-1</sup>: Chamber Volume per min. The induction chamber had a volume of 7 liters: 20% CV.min<sup>-1</sup> = 1.4 l.min<sup>-1</sup>, 60% CV.min<sup>-1</sup> = 4.2 l.min<sup>-1</sup>.  
doi:10.1371/journal.pone.0032290.t003

Prior to the start of each procedure, the empty chamber was filled 3 times with the different gas mixtures and the linearity of the filling rate for each the gases was confirmed by linear regression.

### Pilot study

To the best of the authors' knowledge, there was no published data describing the use of N<sub>2</sub>O in mice and its potential effect on time to induction of anaesthesia. A pilot study was therefore conducted to assess whether nitrous oxide had demonstrable effects that could be associated with a "second gas effect" in mice.

A total of 12 C57Bl/6 female mice were used in a crossover study design. Each of the 12 mice received each of the 3 treatments (Table 2) with at least a 48 h washout period between treatments. The mice were individually placed in the induction chamber described above and were allowed a 2 minute acclimatization period after which the gases were delivered to the chamber. The loss of righting reflex (LORR) was confirmed by tilting of the chamber and the time to LORR was recorded as an indicator to loss of consciousness. LORR was taken as the point at which a recumbent mouse showed no attempt to right itself when the cage was tipped to a 45° angle. Once LORR was lost, gas inflow was discontinued, and the mice were removed and placed in an incubator at 30°C for 30 min before being returned to their home cage.

The time to loss of righting reflex was analyzed by repeated measures ANOVA (SPSS for Windows, Version 18, IBM Corporation, Somers, NY, USA), with  $\alpha = 0.005$ .

### Main study

A sample size calculation was made using the variance obtained in the pilot study (NQuery 7.0, Statistical Solutions, Boston, MA, USA). In order for the main study to reach 90% power and detect a difference in means at the 0.05 level the sample size was calculated at n=12 mice per group. Twelve mice were subsequently allocated to one of 3 gas mixtures (Table 3) according to a randomized-block study design. Each of the 3 groups included 6 CD1 mice (3 males, 3 females), and 6 C57Bl/6 mice (3 males, 3 females).

Each of the 3 gas mixtures supplied CO<sub>2</sub> at a gradually rising concentration, with a flow rate of 20% CV.min<sup>-1</sup> (1.4 l.min<sup>-1</sup>), which was equivalent to a commonly recommended CO<sub>2</sub> flow rate (e.g. Hawkins *et al.*, 2006). In group 1, no other gas was added to the CO<sub>2</sub>. In group 2, N<sub>2</sub>O at a rate corresponding to 60% CV.min<sup>-1</sup> (4.2 l.min<sup>-1</sup>) was added to the CO<sub>2</sub>. In the 3<sup>rd</sup> group, an inert gas, nitrogen (N<sub>2</sub>) at a rate corresponding to 60% of the CV.min<sup>-1</sup> (4.2 l.min<sup>-1</sup>) was added to the CO<sub>2</sub> in place of the N<sub>2</sub>O.

The mice were individually placed in the euthanasia chamber and the video recording was commenced. After 2 minutes of acclimatization the gas mixture 1, 2 or 3 was delivered to the chamber. The time to loss of righting reflex (LORR) was measured

(sec) as an indicator for the loss of consciousness. The LORR was considered to have occurred when the mouse did not attempt to regain sternal recumbency after being rolled onto its back by tilting of the induction chamber. The video recording was stopped at this point.

The mouse was immediately taken out of the chamber and placed on a tightly fitted face-mask. The same gas mixture being supplied to the chamber was supplied via the face-mask. After ensuring that the mouse was unconscious, a cardiac puncture was performed by an experienced operator. The left ventricular blood sample obtained was immediately analyzed and the following parameters were measured: pH, arterial partial pressure of oxygen (P<sub>a</sub>O<sub>2</sub>) and CO<sub>2</sub> (P<sub>a</sub>CO<sub>2</sub>) in mmHg, and lactate in mmol/l (iStat, Abbott, Princeton, NJ, USA). Death was ensured by cervical dislocation of the unconscious animal.

The video-recordings were retrospectively analyzed by a single observer in a blind manner using the behavioural scoring software Observer<sup>®</sup> XT (Noldus, Wageningen, Netherlands). Rearing, and jumping were codified using the software. Rearing was defined as a bipedal posture, the mouse standing on its hind limbs, with or without placement of the fore limbs onto the wall of the box. Jumping was defined as a sudden springing off the ground where all four feet left the cage floor. The incidence of these behaviours was quantified during the acclimatization period and during the euthanasia gas exposure period of each animal.

The F<sub>i</sub>CO<sub>2</sub> (%) at time for LORR was retrospectively calculated based on the mean time to LORR for each of the 3 groups and linear regression of the F<sub>i</sub>CO<sub>2</sub> based on the preliminary filling rate of the empty induction chamber.

### Statistical analysis

The data are presented as mean  $\pm$  standard deviation (SD). Statistical analyses were carried out using SPSS for Windows (Version 19.0, IBM Corporation, Somers, NY, USA). The effect of treatment, strain and sex upon time to loss of righting reflex (sec), pH, PaO<sub>2</sub> (mmHg), lactate (mmol.l<sup>-1</sup>), and the incidence of 3 behavioural events (rearing, climbing, jumping) were analysed using three way analyses of variance. Post-hoc analyses were performed using Tukey's honestly significant difference. Data are presented as mean  $\pm$  1 S.D. Differences were considered significant at P<0.05. Where data did not differ significantly between sexes or strains, averages data for each treatment group are presented as the combined data for both strains and/or sexes.

### Acknowledgments

The authors gratefully acknowledge the help of Ching Ip for his assistance with the pilot study, as well as Prof Eddie Clutton (Royal (Dick) School of Veterinary Studies, Edinburgh, UK) for helpful discussions. Animals were donated by Charles River UK.

## Author Contributions

Conceived and designed the experiments: AAT HDRG PAF. Performed the experiments: AAT HDRG PAF. Analyzed the data: AAT HDRG.

Contributed reagents/materials/analysis tools: AAT HDRG. Wrote the paper: AAT HDRG.

## References

- Home Office (2010) Statistic of scientific procedures on living animals, Great Britain 2010- Annual statistics relating to scientific procedures performed on living animals under the provisions of the Animals (Scientific Procedures) Act 1986. Home Office guidelines. <http://www.homeoffice.gov.uk/publications/science-research-statistics/research-statistics/science-research/spanimals10/>. Doi 22/08/2011.
- Coenen AM, Drinkenburg WH, Hoenderken R, van Luijtelaar EL (1995) Carbon dioxide euthanasia in rats: oxygen supplementation minimizes signs of agitation and asphyxia. *Laboratory Animals* 29: 262–268.
- Danneman P, Stein S, Walshaw S (1997) Humane and practical implications of using carbon dioxide mixed with oxygen for anesthesia or euthanasia of rats. *Lab Anim Sci* 47: 376–385.
- Fenwick DC, Blackshaw JK (1989) Carbon dioxide as a short-term restraint anaesthetic in rats with subclinical respiratory disease. *Laboratory Animals* 23: 220–228.
- Hackbarth H, Kuppers N, Bohnet W (2000) Euthanasia of rats with carbon dioxide - animal welfare aspects. *Laboratory Animals* 34: 91–96.
- Brosnan RJ, Eger EI, Laster MJ, Sonner JM (2007) Anesthetic properties of carbon dioxide in the rat. *Anesthesia & Analgesia* 105: 103–106. doi:10.1213/01.ane.0000265556.69089.78.
- Brosnan RJ, Pham TL (2008) Carbon dioxide negatively modulates N-methyl-D-aspartate receptors. *British Journal of Anaesthesia* 101: 673–679. doi:10.1093/bja/aen266.
- Conlee KM, Stephens ML, Rowan AN, King LA (2005) Carbon dioxide for euthanasia: concerns regarding pain and distress, with special reference to mice and rats. *Laboratory Animals* 39: 137–161. doi:10.1258/0023677053739747.
- Niel L, Weary DM (2006) Behavioural responses of rats to gradual-fill carbon dioxide euthanasia and reduced oxygen concentrations. *Applied Animal Behaviour Science* 100: 295–308. doi:10.1016/j.applanim.2005.12.001.
- Makowska IJ (2008) Alternatives to carbon dioxide euthanasia for laboratory rats.
- Anton F, Euchner I (1992) Psychophysical examination of pain induced by defined CO<sub>2</sub> pulses applied to the nasal mucosa. *Pain* 49: 53–60.
- Peppel P, Anton F (1993) Responses of rat medullary dorsal horn neurons following intranasal noxious chemical stimulation: effects of stimulus intensity, duration, and interstimulus interval. *Journal of Neurophysiology* 70: 2260–2275.
- Hawkins P, Playle L, Golledge H, Leach M (2006) Newcastle consensus meeting on carbon dioxide euthanasia of laboratory animals. Available: <http://www.nc3rs.org.uk/downloaddoc.asp?id=416&page=292&skin=0> Accessed 2011 Dec 05.
- Liotti M (2001) Brain responses associated with consciousness of breathlessness (air hunger). *Proceedings of the National Academy of Sciences* 98: 2035–2040. doi:10.1073/pnas.98.4.2035.
- Banzett RB, Moosavi SH (2001) Dyspnea and pain: similarities and contrasts between two very unpleasant sensations. *Am Pain Soc Bulletin* 11: 1.
- Banzett RB, Dempsey JA, O'Donnell DE, Wamboldt MZ (2000) Symptom perception and respiratory sensation in asthma. *Am J Respir Crit Care Med* 162: 1178–1182.
- Morélot-Panzini C, Demoule A (2007) Dyspnea as a Noxious Sensation: Inspiratory Threshold Loading May Trigger Diffuse Noxious Inhibitory Controls in Humans. *Journal of Neurophysiology* 97: 1396–1404.
- Schön D, Dahme B, Leupoldt AV (2008) Associations between the perception of dyspnea, pain, and negative affect. *Psychophysiology* 45: 1064–1067. doi:10.1111/j.1469-8986.2008.00704.x.
- Leupoldt A, Dahme B (2007) Experimental comparison of dyspnea and pain. *Behav Res* 39: 137–143. doi:10.3758/BF03192852.
- Ziemann AE, Allen JE, Dahdaleh NS, Drebot II, Coryell MW, et al. (2009) The Amygdala Is a Chemosensor that Detects Carbon Dioxide and Acidosis to Elicit Fear Behavior. *Cell* 139: 1012–1021. doi:10.1016/j.cell.2009.10.029.
- Sawamura S, Kingery W, Davies M, et al. (2000) Antinociceptive Action of Nitrous Oxide Is Mediated by Stimulation of Noradrenergic Neurons in the Brainstem and Activation of  $\alpha$ 2B Adrenoceptors. *The Journal of Neurosciences* 24: 9242–9251.
- Zhang C, Davies MF, Guo TZ, Maze M (1999) The analgesic action of nitrous oxide is dependent on the release of norepinephrine in the dorsal horn of the spinal cord. *Anesthesiology* 91: 1401–1407.
- Miller K, Paton W, Smith E, et al. (1972) Physicochemical approaches to the mode of action of general anesthetics. *Anesthesiology* 36: 339–351.
- Russell GB, Graybeal JM (1998) Nonlinear additivity of nitrous oxide and isoflurane potencies in rats. *Can J Anaesth* 45: 466–470. doi:10.1007/BF03012583.
- Gonsowski CT, Eger EI (1994) Nitrous oxide minimum alveolar anesthetic concentration in rats is greater than previously reported. *Anesthesia & Analgesia* 79: 710–712.
- Taheri S, Eger EI (1999) A demonstration of the concentration and second gas effects in humans anesthetized with nitrous oxide and desflurane. *Anesthesia & Analgesia* 89: 774–780.
- Korman B, Mapleson W (1997) Concentration and second gas effects: can the accepted explanation be improved? *British Journal of Anaesthesia* 78: 618–625.
- Muzi M, Robinson BJ, Ebert TJ, O'Brien TJ (1996) Induction of anesthesia and tracheal intubation with sevoflurane in adults. *Anesthesiology* 85: 536–543.
- Stoelting RK, Eger EI (1969) An additional explanation for the second gas effect: a concentrating effect. *Anesthesiology* 30: 273–277.
- Epstein RM, Rackow H, Salanitre E, Wolf GL (1964) Influence of the concentration effect on the uptake of anesthetic mixtures: the second gas effect. *Anesthesiology* 25: 364–371.
- Kitahata LM, Taub A, Conte AJ (1971) The effect of nitrous oxide on alveolar carbon dioxide tension: a second-gas effect. *Anesthesiology* 35: 607–611.
- Parbrook GD (1968) Therapeutic uses of nitrous oxide. *Br J Anaesth* 40: 365–372. doi:10.1093/bja/40.5.365.
- Taheri S, Eger EE (1999) A Demonstration of the Concentration and Second Gas Effects in Humans Anesthetized with Nitrous Oxide and Desflurane. *Anesthesia & Analgesia* 89: 774–780.
- Smith WDA (1972) A history of nitrous oxide and oxygen anaesthesia part IA: the discovery of nitrous oxide and of oxygen. *British Journal of Anaesthesia* 44: 297–304.
- Volmanen P, Palomäki O, Ahonen J (2011) Alternatives to neuraxial analgesia for labor. *Curr Opin Anaesthesiol* 24: 235–241. doi:10.1097/ACO.0b013e328345ad18.
- Eger EI (1963) Effect of inspired anesthetic concentration on the rate of rise of alveolar concentration. *Anesthesiology* 24: 153–157.
- Mutoh T, Nishimura R, Sasaki N (2001) Effects of nitrous oxide on mask induction of anesthesia with sevoflurane or isoflurane in dogs. *American Journal of Veterinary Research* 62: 1727–1733.
- Peyton PJ, Horriat M, Robinson GJB, Pierce R, Thompson BR (2008) Magnitude of the second gas effect on arterial sevoflurane partial pressure. *Anesthesiology* 108: 381–387.
- Barr G, Jakobsson JG, Owall A, Anderson RE (1999) Nitrous oxide does not alter bispectral index: study with nitrous oxide as sole agent and as an adjunct to i.v. anaesthesia. *British Journal of Anaesthesia* 82: 827–830.
- Flecknell P (2009) *Laboratory Animal Anaesthesia*. Academic Press. 300 p.
- Sonner JM, Gong D, Li J, Eger EI, Laster MJ (1999) Mouse strain modestly influences minimum alveolar anesthetic concentration and convulsivity of inhaled compounds. *Anesthesia & Analgesia* 89: 1030–1034.
- West JB (2008) *Respiratory physiology*. Lippincott Williams & Wilkins. 186 p.
- Chuang IC, Dong HP, Yang RC, Wang TH, Tsai JH, et al. (2010) Effect of carbon dioxide on pulmonary vascular tone at various pulmonary arterial pressure levels induced by endothelin-1. *Lung* 188: 199–207. doi:10.1007/s00408-010-9234-7.
- Widdicombe J (1998) Nasal and pharyngeal reflexes, In OP. Mathew, G. Sant'Ambrogio, eds. *Respiratory Function of the Upper Airway*, Marcel Dekker, Inc., New York. pp 233–258.
- Yavari P, McCulloch PF, Panneton WM (1996) Trigeminal-mediated alteration of cardiorespiratory rhythms during nasal application of carbon dioxide in the rat. *J Auton Nerv Syst* 61: 195–200.
- Kohler I, Meier R, Busato A, Neiger-Aeschbacher G, Schatzmann U (1999) Is carbon dioxide (CO<sub>2</sub>) a useful short acting anaesthetic for small laboratory animals? *Laboratory Animals* 33: 155–161. doi:10.1258/002367799780578390.
- Graham GR, Hill DW, Nunn JF (1960) Die Wirkung hoher CO<sub>2</sub>-konzentrationen auf Kreislauf und Atmung. *Der Anästhesist* 9: 7–3.
- Luft U (1965) Aviation physiology—the effects of altitude. In: *Hand-book of Physiology*. Respiration. Washington, DC: Am. Physiol. Soc., sect. 3, vol. II, chapt. 44. pp 1099–1145.
- Moosavi SH, Golestanian E, Binks AP, Lansing RW, Brown R, et al. (2003) Hypoxic and hypercapnic drives to breathe generate equivalent levels of air hunger in humans. *J Appl Physiol* 94: 141–154. doi:10.1152/jappphysiol.00594.2002.
- Caruana-Montaldo B (2000) *The Control of Breathing in Clinical Practice\**. Chest 117: 205–225. doi:10.1378/chest.117.1.205.
- Cunningham DJ, Howson MG, Metias EF, Petersen ES (1986) Patterns of breathing in response to alternating patterns of alveolar carbon dioxide pressures in man. *J Physiol (Lond.)* 376: 31–45.
- Mohan R, Duffin J (1997) The effect of hypoxia on the ventilatory response to carbon dioxide in man. *Respir Physiol* 108: 101–115.
- Skevington S, Pilaar M, Routh D, Macleod R (1997) On the language of breathlessness. *Psych & Hlth* 12: 677–689. doi:10.1080/08870449708407414.
- Simon P, Schwarstein R, Weiss J, Fencel V, Teghtsoonian M, et al. (1990) Distinguishable Types of Dyspnea in Patients with Shortness of Breath. *Am Rev Respir Dis* 142: 1009–1014.

55. Irwin S (1968) Comprehensive observational assessment: Ia. A systematic, quantitative procedure for assessing the behavioral and physiologic state of the mouse. *Psychopharmacologia* 13: 222–257.
56. Antognini JF (1997) The relationship among brain, spinal cord and anesthetic requirements. *Med Hypotheses* 48: 83–87.
57. Antognini JF, Carstens E (1998) Macroscopic sites of anesthetic action: brain versus spinal cord. *Toxicol Lett* 100–101: 51–58.
58. Stabernack C, Sonner JM, Laster M, Zhang Y, Xing Y, et al. (2003) Spinal N-methyl-d-aspartate receptors may contribute to the immobilizing action of isoflurane. *Anesthesia & Analgesia* 96: 102–7.
59. Hatchell PL, MacInnes JW (1973) A quantitative analysis of the genetics of resting blood lactic acid levels in mice. *Genetics* 75: 191–198.
60. Lee EJ, Woodske ME, Zou B, O'Donnell CP (2009) Dynamic arterial blood gas analysis in conscious, unrestrained C57BL/6J mice during exposure to intermittent hypoxia. *J Appl Physiol* 107: 290–294. doi:10.1152/jappphysiol.91255.2008.
61. Wasserman K (1987) Determinants and detection of anaerobic threshold and consequences of exercise above it. *Circulation* 76: VI29–39.
62. Deval E, Gasull X, Noël J, Salinas M, Baron A, et al. (2010) Acid-Sensing Ion Channels (ASICs): Pharmacology and implication in pain. *Pharmacology & Therapeutics* 128: 549–558. doi:10.1016/j.pharmthera.2010.08.006.
63. Ikeuchi M, Kolker SJ, Burnes LA, Walder RY, Sluka KA (2008) Role of ASIC3 in the primary and secondary hyperalgesia produced by joint inflammation in mice. *Pain* 137: 662–669. doi:10.1016/j.pain.2008.01.020.
64. Price M, McIlwrath S, Xie J, Cheng C, Qiao J, et al. (2001) The DRASIC cation channel contributes to the detection of cutaneous touch and acid stimuli in mice. *Neuron* 32: 1071–1083.
65. Wultsch T, Painsipp E, Shahbazian A, Mitrovic M, Edelsbrunner M, et al. (2008) Deletion of the acid-sensing ion channel ASIC3 prevents gastritis-induced acid hyperresponsiveness of the stomach-brainstem axis. *Pain* 134: 245–253. doi:10.1016/j.pain.2007.04.025.
66. Baron A, Voilley N, Lazdunski M, Lingueglia E (2008) Acid sensing ion channels in dorsal spinal cord neurons. *J Neurosci* 28: 1498–1508. doi:10.1523/JNEUROSCI.4975-07.2008.
67. Wu L, Duan B, Mei Y, Gao J, Chen J, et al. (2004) Characterization of acid-sensing ion channels in dorsal horn neurons of rat spinal cord. *Journal of Biological Chemistry* 279: 43716–43724. doi:10.1074/jbc.M403557200.
